# Supplementary material for: Ultralow magnetostrictive flexible ferromagnetic nanowires
Source: Royal Society of Chemistry journal article supplement (doi:10.1039/d0nr08355k), 2021-01-01
Supplement: d0nr08355k1.pdf [file d0nr08355k1.pdf]

## Supporting Information

### Ultralow Magnetostrictive Flexible Ferromagnetic Nanowires

Giuseppe Muscas<sup>1,3</sup>, Petra E. Jönsson<sup>1</sup>, I. G. Serrano<sup>1</sup>, Örjan Vallin<sup>2</sup>, and M. Venkata Kamalakar<sup>1\*</sup>

<sup>1</sup>Department of Physics and Astronomy, Uppsala University, Box 516, SE-751 20 Uppsala, Sweden

<sup>2</sup>Department of Engineering Sciences, Uppsala University, Box 534, SE-751 21 Uppsala, Sweden

<sup>3</sup>Department of Physics, University of Cagliari, Cittadella Universitaria di Monserrato, S.P. 8 Km 0.700 (Monserrato-Sestu), I-09042 Monserrato CA, Italy

\*Email: [venkata.mutta@physics.uu.se](mailto:venkata.mutta@physics.uu.se)

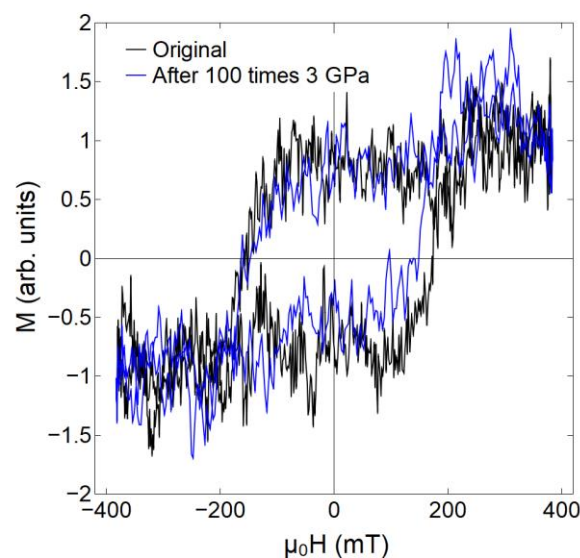

Figure S1.  $M(H)$  loop measured along the easy axis of Co nanowires with size  $1.0\ \mu\text{m} \times 100\ \text{nm}$ . The curve has been measured for the as-prepared original sample (black curve) and after a stress test (blue curve) after the application of 3 GPa of tensile stress along the width of the wires 100 times.
